# Supplementary material for: Cyclopentadienyl-based Mg complexes in the intramolecular hydroamination of aminoalkenes: mechanistic evidence for cationic versus neutral magnesium derivatives
Source: Royal Society of Chemistry journal article supplement (doi:10.1039/c5cy01040c), 2016-01-01
Supplement: c5cy01040c1.pdf [file c5cy01040c1.pdf]

Supplementary Information for:

**Cyclopentadienyl-based Mg complexes in the Intramolecular Hydroamination of aminoalkenes:  
Mechanistic evidences for a cationic versus neutral magnesium derivatives.**

**Carlos Gallegos,<sup>a</sup>Ruth Camacho,<sup>a</sup>Mercedes Valiente,<sup>b</sup>Tomás Cuenca,<sup>a</sup>Jesús Cano<sup>a</sup>**

<sup>a</sup>Dpto de Química de Inorgánica, Universidad de Alcalá, 28871 Alcalá de Henares. Spain.

<sup>b</sup>Dpto de Química Física, Universidad de Alcalá, 28871 Alcalá de Henares. Spain.

**Table S1.** HSQC <sup>1</sup>H-<sup>13</sup>C spectrum of **2**.

| $\delta$ <sup>1</sup> H | $\delta$ <sup>13</sup> C |
|-------------------------|--------------------------|
| 5.94                    | 105.4                    |
| 6.17                    | 110.2                    |
| 6.75                    | 116.9                    |

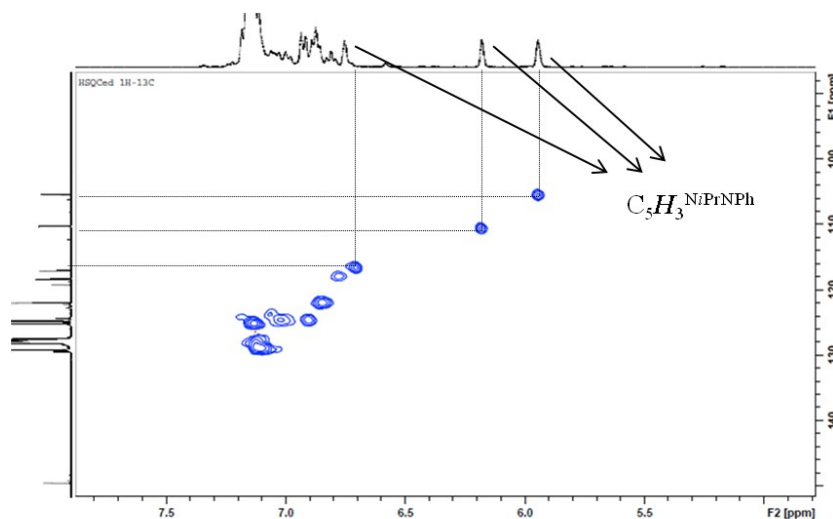

**Figure S1.** HSQC <sup>1</sup>H-<sup>13</sup>C spectrum of **2**.

**Table S2.** HMBC <sup>1</sup>H-<sup>13</sup>C spectrum of **2**.

| Assignment                                                                                       | $\delta$ <sup>1</sup> H | $\delta$ <sup>13</sup> C |
|--------------------------------------------------------------------------------------------------|-------------------------|--------------------------|
| (CH <sub>3</sub> ) <sub>2</sub> Si                                                               | 0.63, 0.58              | 117.5                    |
|                                                                                                  |                         | 105.9                    |
| C <sub>5</sub> H <sub>3</sub> CH <sub>2</sub> CH <sub>2</sub> N(CHMe <sub>2</sub> ) <sub>2</sub> | 2.42-2.36               | 110.2                    |
|                                                                                                  |                         | 119.2                    |
| C <sub>5</sub> H <sub>3</sub> CH <sub>2</sub> CH <sub>2</sub> N(CHMe <sub>2</sub> ) <sub>2</sub> | 1.95                    | 119.2                    |

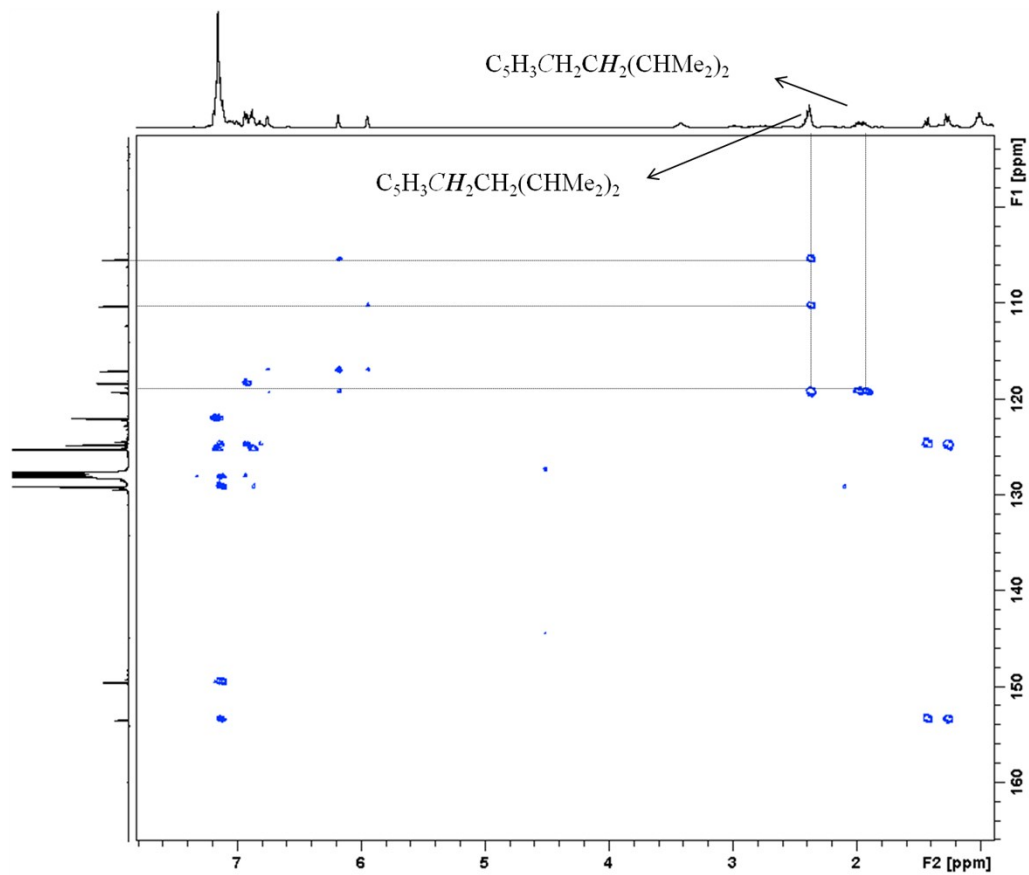

**Figure S2.** HMBC  $^1\text{H}$ - $^{13}\text{C}$  spectrum of **2**.

## Diffusion Ordered Spectroscopy (<sup>1</sup>H-DOSY) experiments.

According to literature procedures<sup>2</sup> the internal reference method was employed. Three different patrons were chosen. Tetramethylsilane (SiMe<sub>4</sub>, M<sub>w</sub> = 88.22), 1,2,3,4-tetraphenylnaphtalene (TPhN, M<sub>w</sub> = 432.53) and dendrimer G2O3A12 (DEN, M<sub>w</sub> = 1424.23, figure S4). These three patrons and **2** were placed in an NMR tube and 0.5 mL of C<sub>6</sub>D<sub>6</sub> was added. After the DOSY experiment was recorded Log D vs Log M<sub>w</sub> of patrons was plotted. The molecular weight can be then obtained by interpolating the D value of the desired complex.

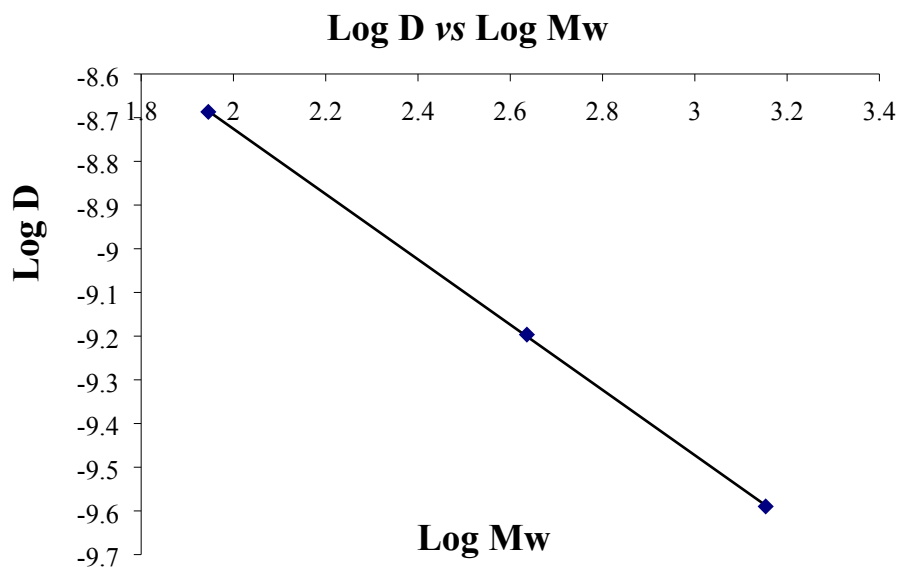

Figure S3. Log D vs Log Mw of **2**.

Table S3: D, Log D, M<sub>w</sub> and Log M<sub>w</sub> values of three patrons and **2**.

| Compound          | 10 <sup>-10</sup> D (m <sup>2</sup> s <sup>-1</sup> ) | Log D   | M <sub>w</sub> (g mol <sup>-1</sup> ) | Log M <sub>w</sub> |
|-------------------|-------------------------------------------------------|---------|---------------------------------------|--------------------|
| SiMe <sub>4</sub> | 20.6                                                  | -8.6868 | 88.22                                 | 1.9455             |
| TPhN              | 6.36                                                  | -9.1965 | 432.53                                | 2.6360             |
| DEN               | 2.57                                                  | -9.5897 | 1424.23                               | 3.1536             |
| <b>2</b>          | 5.84                                                  | -9.2334 | 478.25                                | 2.6797             |

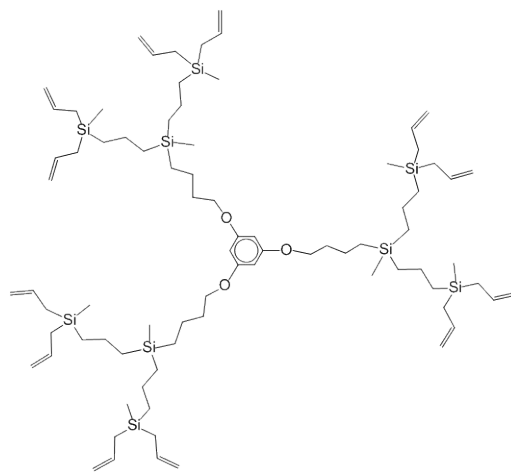

**Figure S4.** Structure of carborasilane dendrimer G2O3A12.<sup>1</sup>

Dendrimer G2O3A12 was synthesized according literature procedure.<sup>1</sup>

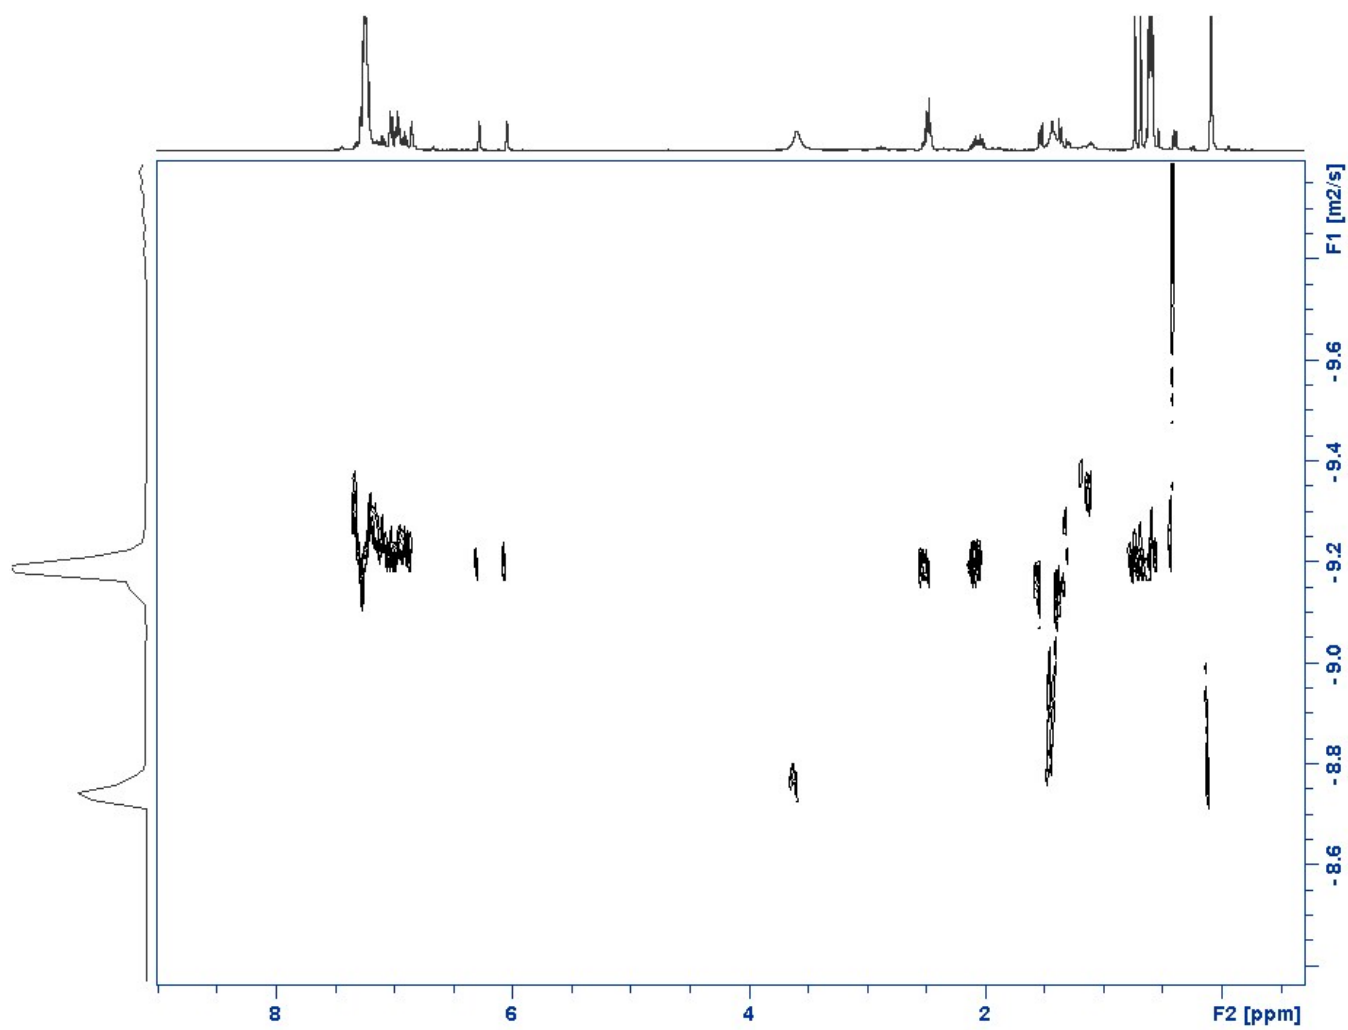

**Figure S5.** DOSY <sup>1</sup>H of **2** in C<sub>6</sub>D<sub>6</sub>/THF.

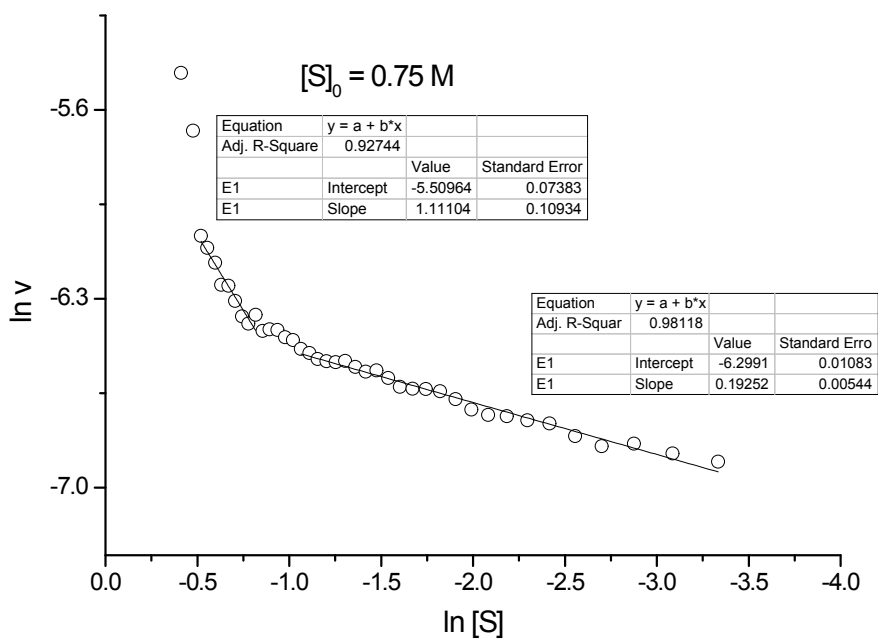

**Figure S6.** Plot of  $\ln v$  versus  $\ln S$  for the hydroamination of **A** catalyzed by **2** at 25 °C with  $[C]_0 = 20$  mM.

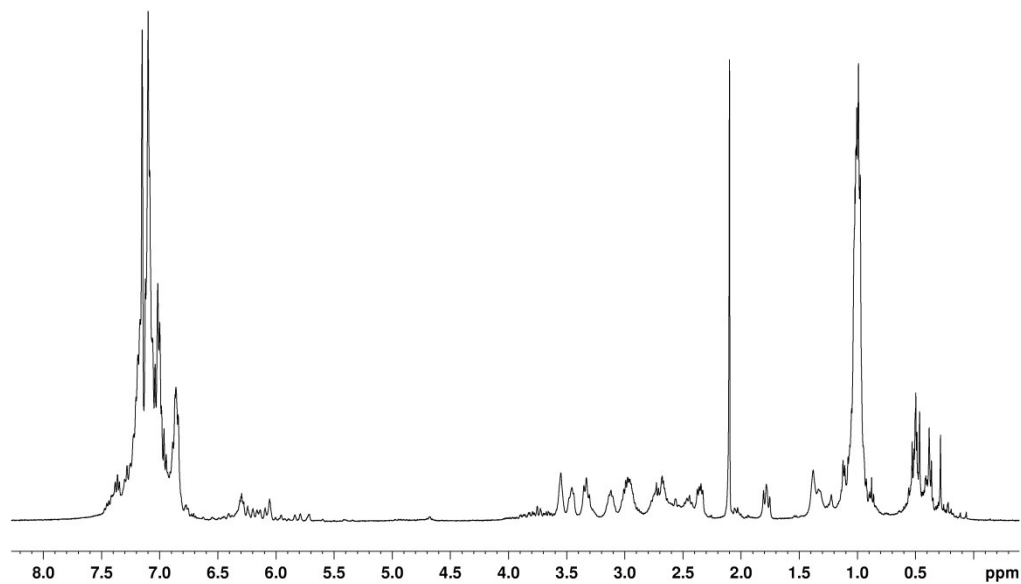

**Figure S7.** Stoichiometric reaction between **A** and **2** in a ratio 1:1 was carried out at 70 °C.

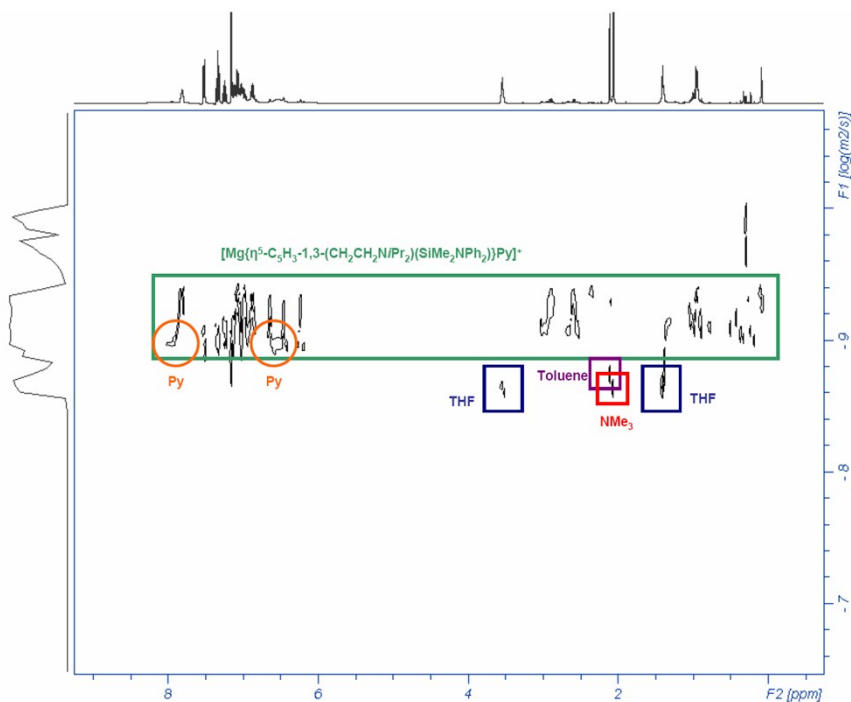

**Figure S8.** DOSY  $^1\text{H}$  of **4** in  $\text{C}_6\text{D}_6/\text{C}_6\text{H}_5\text{N}$ .

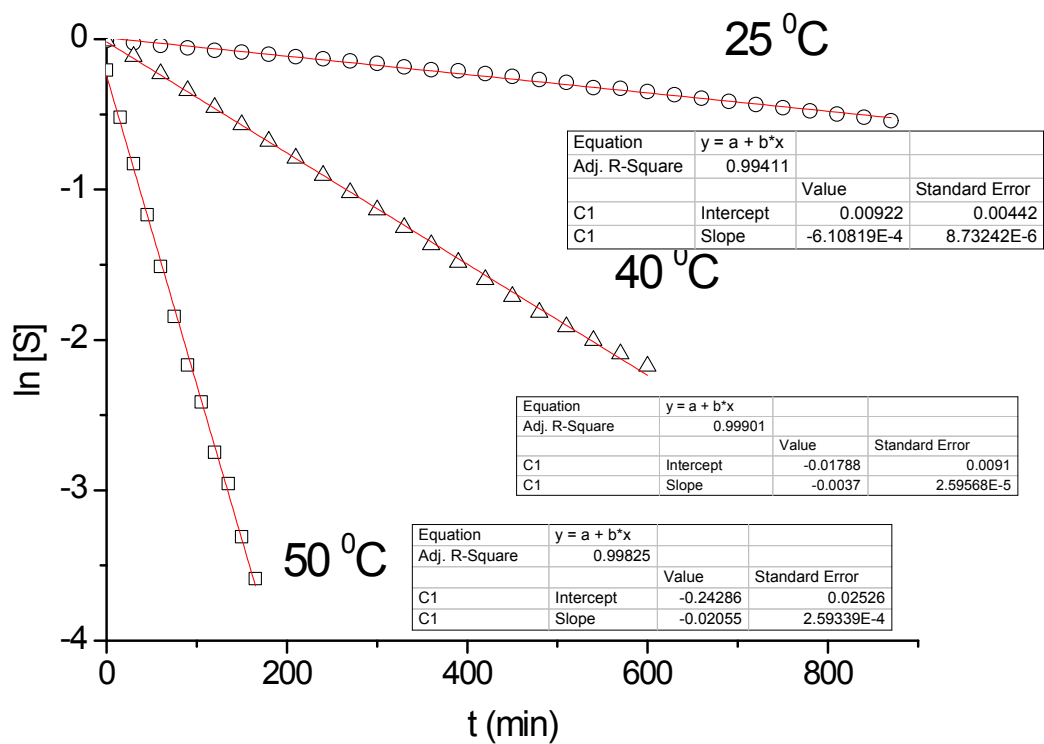

**Figure S9.** Plot of  $\ln S$  versus  $t$  for the hydroamination of **A** catalyzed by **4** with  $[\text{S}]_0 = 1 \text{ M}$ .

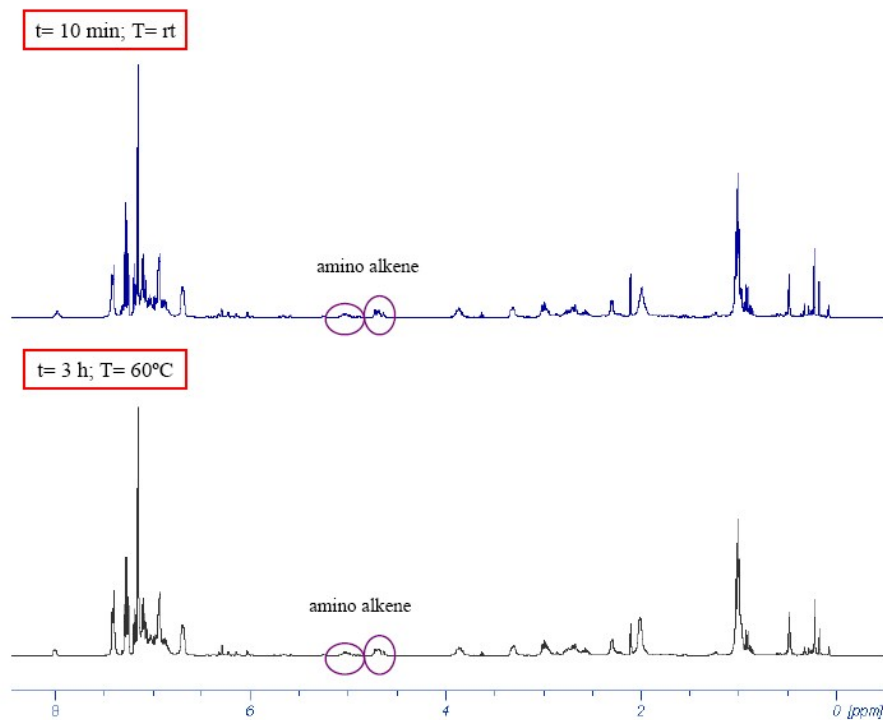

**Figure S10.** Stoichiometric reaction between **A** and **4** in a ratio 1:1. No reaction was observed.

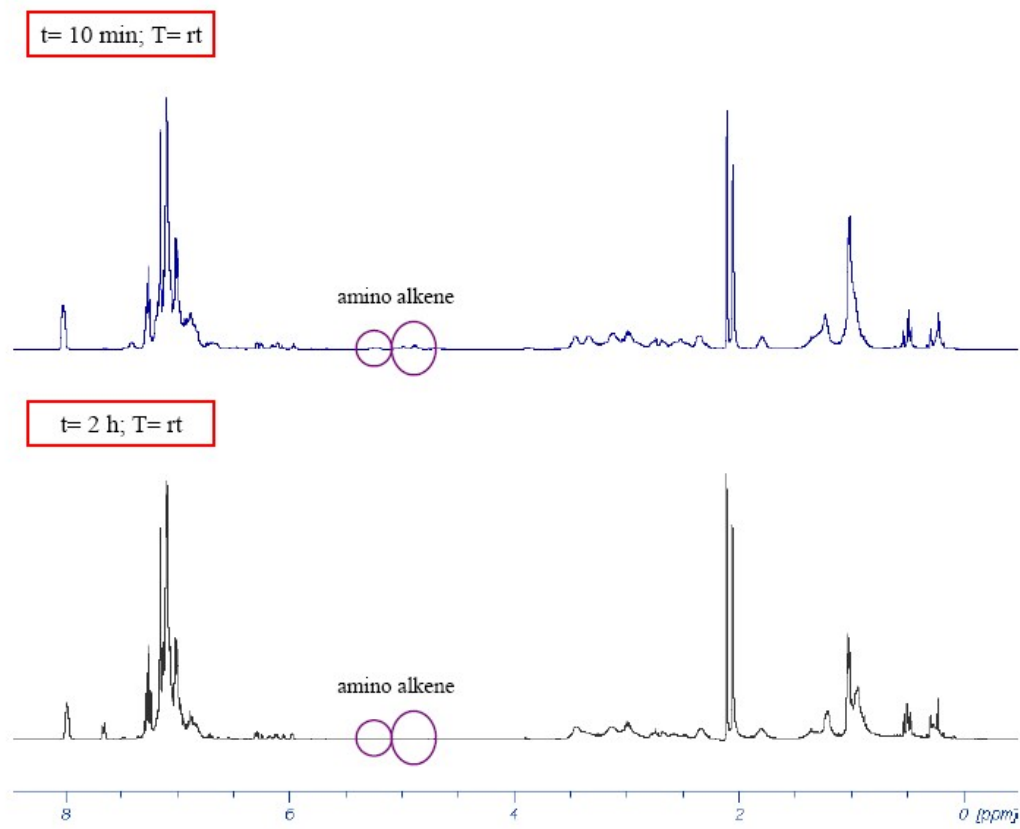

**Figure S11.** Stoichiometric reaction between **A** and **4** in a ratio 1:2 at rt.

1. Sánchez-Nieves, J., Ortega, P., Muñoz-Fernández, M. A., Gómez R., de la Mata, F. J. *Tetrahedron*, **2010**, *66*, 9203.
2. Li, D., Keresztes, I., Hopson, R. Williard, P. G. *Acc. Chem. Res.* **2009**, *42*, 270.
